# Supplementary material
Source: MDPI journal article supplement (https://www.mdpi.com/1999-4907/13/6/921)
Supplement: s1 [file s1]

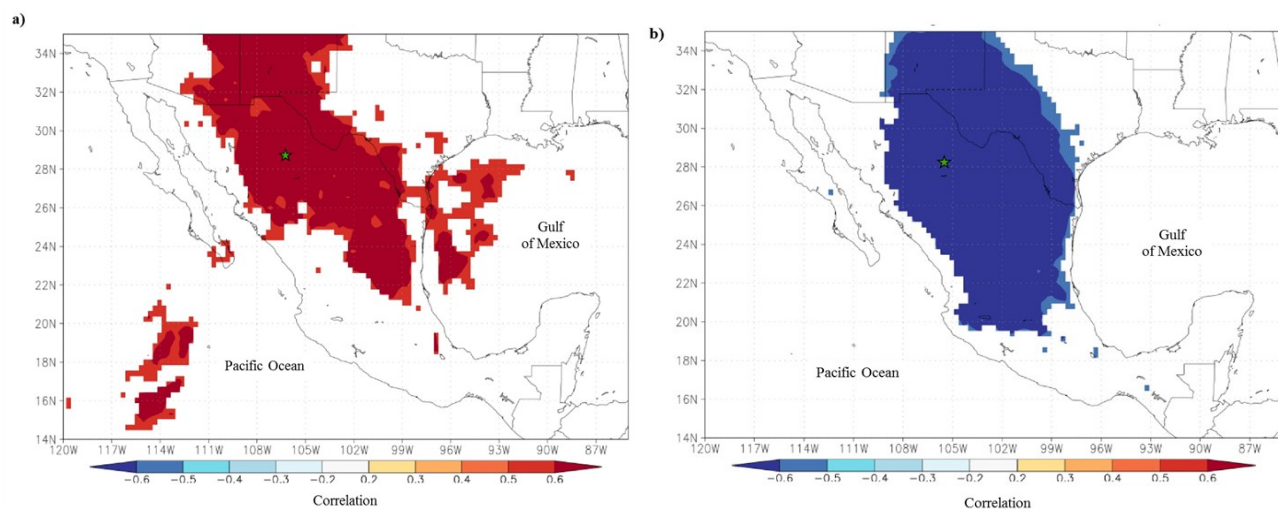

**Figure S1.** (a) Correlation between regional chronology and average monthly precipitation from November of the previous year to June of the current growth year; (b) and with average monthly temperature from January to July of the current growth year. The green star on both maps represents the study area.

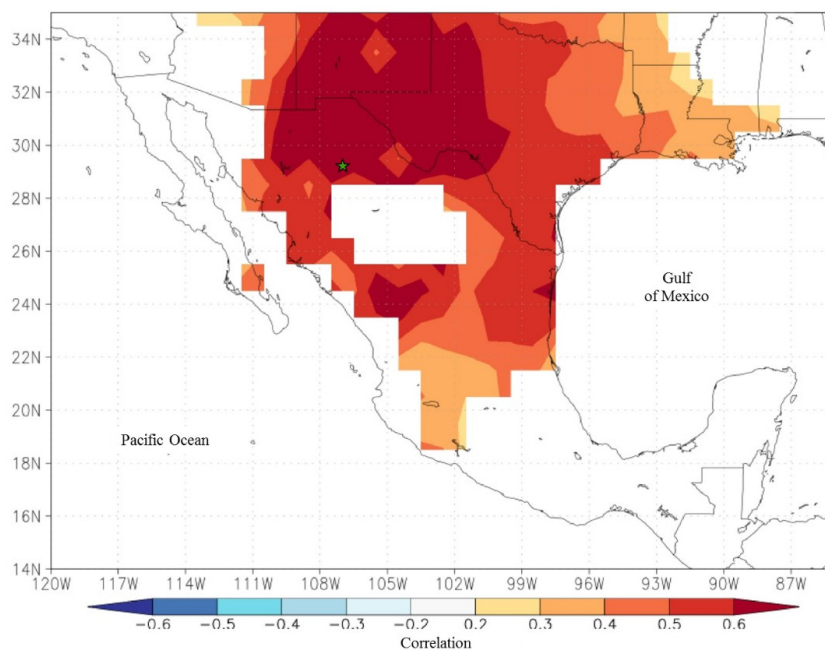

**Figure S2.** Spatial exploration between the regional chronology and the annual SPEI. The green star on map represents the study area.

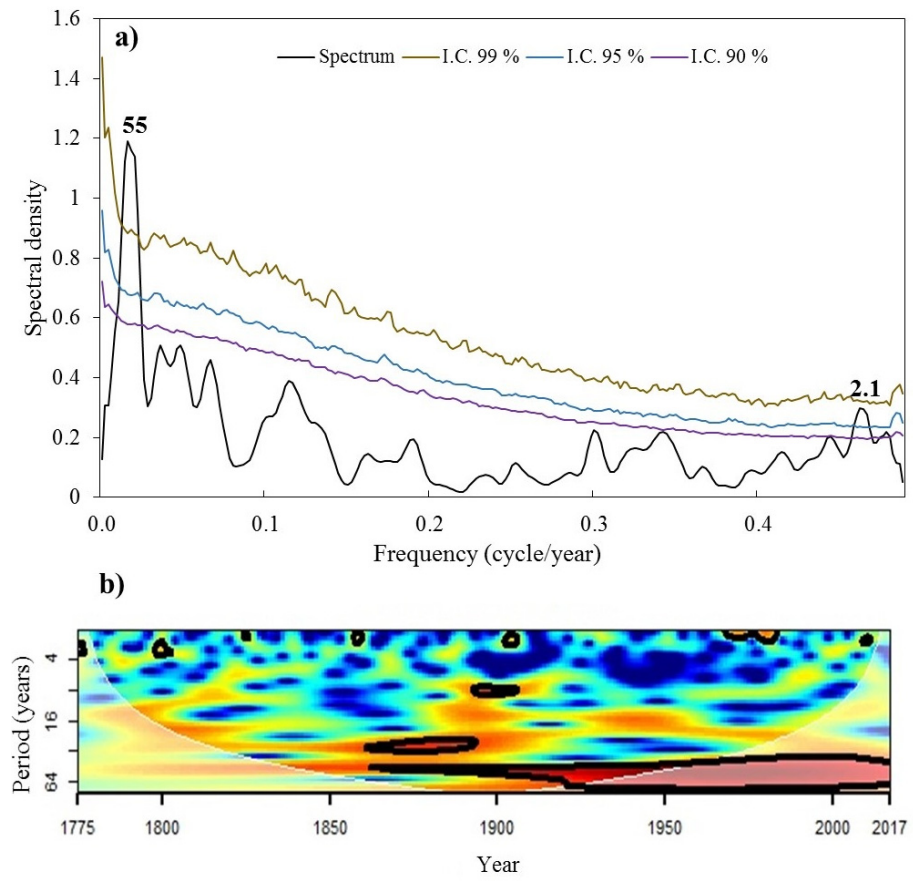

**Figure S3.** a) Power spectral density analysis of the reconstructed SPEI; and b) wavelet analysis; the black outlines on the cone of influence are significant ( $p < 0.05$ ).
